# Supplementary material for: Exhaled carbon monoxide and its associations with smoking, indoor household air pollution and chronic respiratory diseases among 512 000 Chinese adults
Source: PubMed Central journal article supplement (PMC3807615; doi:10.1093/ije/dyt158), 2013-09-20
Supplement: supp_dyt158_ije-2013-02-0222-File004.pdf [file supp_dyt158_ije-2013-02-0222-File004.pdf]

## SUPPLEMENTARY MATERIAL

### **Exhaled carbon monoxide and its associations with smoking, indoor household air pollution and chronic respiratory diseases among 512 000 Chinese adults**

Qiuli Zhang<sup>1</sup>, Liming Li<sup>2,3,4</sup>, Margaret Smith<sup>1</sup>, Yu Guo<sup>3,4</sup>, Gary Whitlock<sup>1</sup>, Zheng Bian<sup>3,4</sup>, Om Kurmi<sup>1</sup>, Rory Collins<sup>1</sup>, Junshi Chen<sup>3</sup>, Silu Lv<sup>5</sup>, Zhigang Pang<sup>6</sup>, Chunxing Chen<sup>7</sup>, Naying Chen<sup>8</sup>, Youping Xiong<sup>9</sup>, Richard Peto<sup>1</sup>, Zhengming Chen<sup>1</sup> on behalf of the China Kadoorie Biobank study collaboration

<sup>1</sup> Clinical Trial Service Unit and Epidemiological Studies Unit (CTSU), University of Oxford

<sup>2</sup> School of Public Health, Peking University, Haidan District, Beijing 100191, China

<sup>3</sup> Chinese Center for Disease Control and Prevention, Chang Ping District, Beijing 102206, China

<sup>4</sup> Chinese Academy of Medical Sciences, Dong Cheng District, Beijing 100730, China

<sup>5</sup> Licang Center for Disease Control, Qingdao, Shandong 266100, China

<sup>6</sup> Heilongjiang Center for Disease Control, Harbin, Heilongjiang 150030, China

<sup>7</sup> Meilan Center for Disease Control, Haikou, Hainan 570203, China

<sup>8</sup> Guangxi Center for Disease Control, Nanning, Guangxi 530028, China

<sup>9</sup> Liuyang Center for Disease Control, Liuyang, Hunan 410300, China

**Table S1. Proportion of participants with elevated COex level by exposure to various sources of indoor household air pollution among male and female never smokers**

| Type of exposure                                                         | Men    |                       |         | Women   |                       |         |
|--------------------------------------------------------------------------|--------|-----------------------|---------|---------|-----------------------|---------|
|                                                                          | No.    | COex<br>≥ 7 ppm       | P-value | No.     | COex<br>≥ 7 ppm       | P-value |
|                                                                          |        | No. (% <sup>a</sup> ) |         |         | No. (% <sup>a</sup> ) |         |
| Current daily exposure to passive smoking                                |        |                       |         |         |                       |         |
| No                                                                       | 2 393  | 491 (20.8)            |         | 61 431  | 9 399 (16.9)          |         |
| Yes                                                                      | 2 465  | 546 (21.8)            | 0.43    | 110 238 | 20 967 (18.1)         | <0.0001 |
| Hours of exposure per week                                               |        |                       |         |         |                       |         |
| 1-10                                                                     | 1 402  | 276 (20.2)            |         | 58 378  | 8 264 (17.0)          |         |
| 11-20                                                                    | 425    | 95 (22.9)             |         | 18 524  | 3 200 (18.5)          |         |
| ≥ 21                                                                     | 638    | 175 (25.6)            | 0.02    | 33 336  | 9 503 (22.9)          | <0.0001 |
| Having chimney in kitchen                                                |        |                       |         |         |                       |         |
| Yes/no cooking facility                                                  | 23 882 | 4 107 (19.6)          |         | 219 515 | 25 012 (16.5)         |         |
| No                                                                       | 6 393  | 1 963 (21.7)          | 0.01    | 67 759  | 23 675 (18.6)         | <0.0001 |
| Cooking on the day of survey <sup>b</sup>                                |        |                       |         |         |                       |         |
| Cooking fuel                                                             |        |                       |         |         |                       |         |
| Electricity/gas                                                          | 2 784  | 424 (16.7)            |         | 52 066  | 5 774 (18.5)          |         |
| Wood                                                                     | 847    | 73 (13.4)             |         | 39 794  | 2 640 (13.9)          |         |
| Coal                                                                     | 1 192  | 509 (35.7)            | <0.0001 | 58 248  | 23 152 (28.1)         | <0.0001 |
| Duration of cooking (minutes)                                            |        |                       |         |         |                       |         |
| 1-60                                                                     | 4 687  | 936 (20.6)            |         | 141 900 | 26 970 (20.7)         |         |
| ≥ 61                                                                     | 136    | 70 (29.9)             | 0.02    | 8 208   | 4 596 (27.5)          | <0.0001 |
| Types of coal used when indoor stove burning all day long <sup>b,c</sup> |        |                       |         |         |                       |         |
| Smokeless coal                                                           | 4 022  | 660 (24.4)            |         | 45 344  | 5 975 (23.5)          |         |
| Smoky coal                                                               | 735    | 202 (35.0)            |         | 8 065   | 946 (28.3)            |         |
| Coal brick/coalite                                                       | 4 205  | 1 955 (37.5)          | <0.0001 | 49 353  | 23 289 (35.0)         | <0.0001 |
| Types of fuel used for winter heating <sup>b, d, e</sup>                 |        |                       |         |         |                       |         |
| Electricity/gas/central heating                                          | 1 768  | 373 (30.2)            |         | 10 153  | 1 727 (33.6)          |         |
| Coal/wood                                                                | 1 949  | 962 (41.1)            | 0.003   | 20 262  | 9 604 (39.1)          | 0.0001  |
| Current house "coal-smokey" for those surveyed in winter                 |        |                       |         |         |                       |         |
| No                                                                       | 4 072  | 574 (24.0)            |         | 32 053  | 2 953 (22.8)          |         |
| Yes                                                                      | 2 057  | 988 (28.5)            | 0.10    | 22 760  | 10 419 (26.6)         | 0.0002  |

Note: P-value for heterogeneity or trend test, as appropriate

<sup>a</sup> adjusted for age at survey, area, time of day, season, fuel used for heating in winter, chimney availability, cooking at the survey day, stove using inside the house and "coal-smokey" in winter

<sup>b</sup> restricted to those who reported specified type of fuel used for cooking, stove or heating

<sup>c</sup> restricted to the participants who kept a stove burning slowly all day long inside house

<sup>d</sup> two study areas (Haikou and Zhejiang) were not included in the analysis because of very limit number of cases ( total 4 men and 24 women from these 2 areas were surveyed in winter)

<sup>e</sup> restricted to participants who were surveyed in winter and heated their houses in winter

**Table S2. Prevalence of self-reported or measured chronic respiratory conditions and adjusted odds ratios by levels of COex among male and female never smokers**

| COex category      | No. of never smokers | Cough frequently $\geq$ 3 months |                          | Cough up sputum in morning $\geq$ 3 months |                          | Self-reported tuberculosis |                          | Self-reported emphysema/ bronchitis |                          | Air flow obstruction  |                          |
|--------------------|----------------------|----------------------------------|--------------------------|--------------------------------------------|--------------------------|----------------------------|--------------------------|-------------------------------------|--------------------------|-----------------------|--------------------------|
|                    |                      | No. (% <sup>a</sup> )            | OR <sup>a</sup> (95% CI) | No. (% <sup>a</sup> )                      | OR <sup>a</sup> (95% CI) | No. (% <sup>a</sup> )      | OR <sup>a</sup> (95% CI) | No. (% <sup>a</sup> )               | OR <sup>a</sup> (95% CI) | No. (% <sup>a</sup> ) | OR <sup>a</sup> (95% CI) |
| <b>Men</b>         |                      |                                  |                          |                                            |                          |                            |                          |                                     |                          |                       |                          |
| 1.0-<7.0           | 24 205               | 786 (3.2)                        | 1.00 (0.90-1.11)         | 798 (3.2)                                  | 1.00 (0.90-1.11)         | 626 (2.6)                  | 1.00 (0.90-1.12)         | 795 (3.2)                           | 1.00 (0.90-1.11)         | 1 213 (4.9)           | 1.00 (0.91-1.10)         |
| 7.0-<14.0          | 4 402                | 154 (3.8)                        | 1.19 (1.02-1.38)         | 153 (3.6)                                  | 1.14 (0.97-1.33)         | 114 (2.5)                  | 0.98 (0.82-1.18)         | 133 (3.4)                           | 1.07 (0.91-1.27)         | 226 (5.9)             | 1.23 (1.08-1.40)         |
| $\geq$ 14.0        | 1 668                | 54 (3.5)                         | 1.11 (0.84-1.48)         | 64 (4.5)                                   | 1.40 (1.08-1.82)         | 40 (2.9)                   | 1.13 (0.81-1.57)         | 34 (3.0)                            | 0.94 (0.66-1.33)         | 104 (6.5)             | 1.36 (1.09-1.69)         |
| <i>P for trend</i> |                      |                                  | 0.90                     |                                            | 0.23                     |                            | 0.70                     |                                     | 0.002                    |                       | 0.49                     |
| <b>Women</b>       |                      |                                  |                          |                                            |                          |                            |                          |                                     |                          |                       |                          |
| 1.0-<7.0           | 238 587              | 5 269 (2.1)                      | 1.00 (0.95-1.05)         | 4 655 (1.9)                                | 1.00 (0.95-1.06)         | 2 373 (1.0)                | 1.00 (0.94-1.06)         | 5 187 (2.0)                         | 1.00 (0.95-1.05)         | 9 733 (3.7)           | 1.00 (0.96-1.04)         |
| 7.0-<14.0          | 32 457               | 755 (2.7)                        | 1.28 (1.20-1.37)         | 706 (2.5)                                  | 1.33 (1.25-1.43)         | 538 (1.3)                  | 1.28 (1.18-1.38)         | 633 (2.4)                           | 1.18 (1.10-1.27)         | 1 164 (5.2)           | 1.44 (1.36-1.52)         |
| $\geq$ 14.0        | 16 230               | 375 (2.8)                        | 1.33 (1.19-1.50)         | 374 (2.8)                                  | 1.48 (1.32-1.66)         | 221 (1.4)                  | 1.32 (1.14-1.53)         | 248 (2.5)                           | 1.24 (1.08-1.42)         | 596 (6.3)             | 1.76 (1.61-1.93)         |
| <i>P for trend</i> |                      |                                  | 0.008                    |                                            | <0.0001                  |                            | <0.0001                  |                                     | <0.0001                  |                       | 0.0002                   |

<sup>a</sup> adjusted for age at survey, area, time of day, season and educational level

Figure S1. Geometric COex level by time of day and month among 210 176 men and 302 609 women

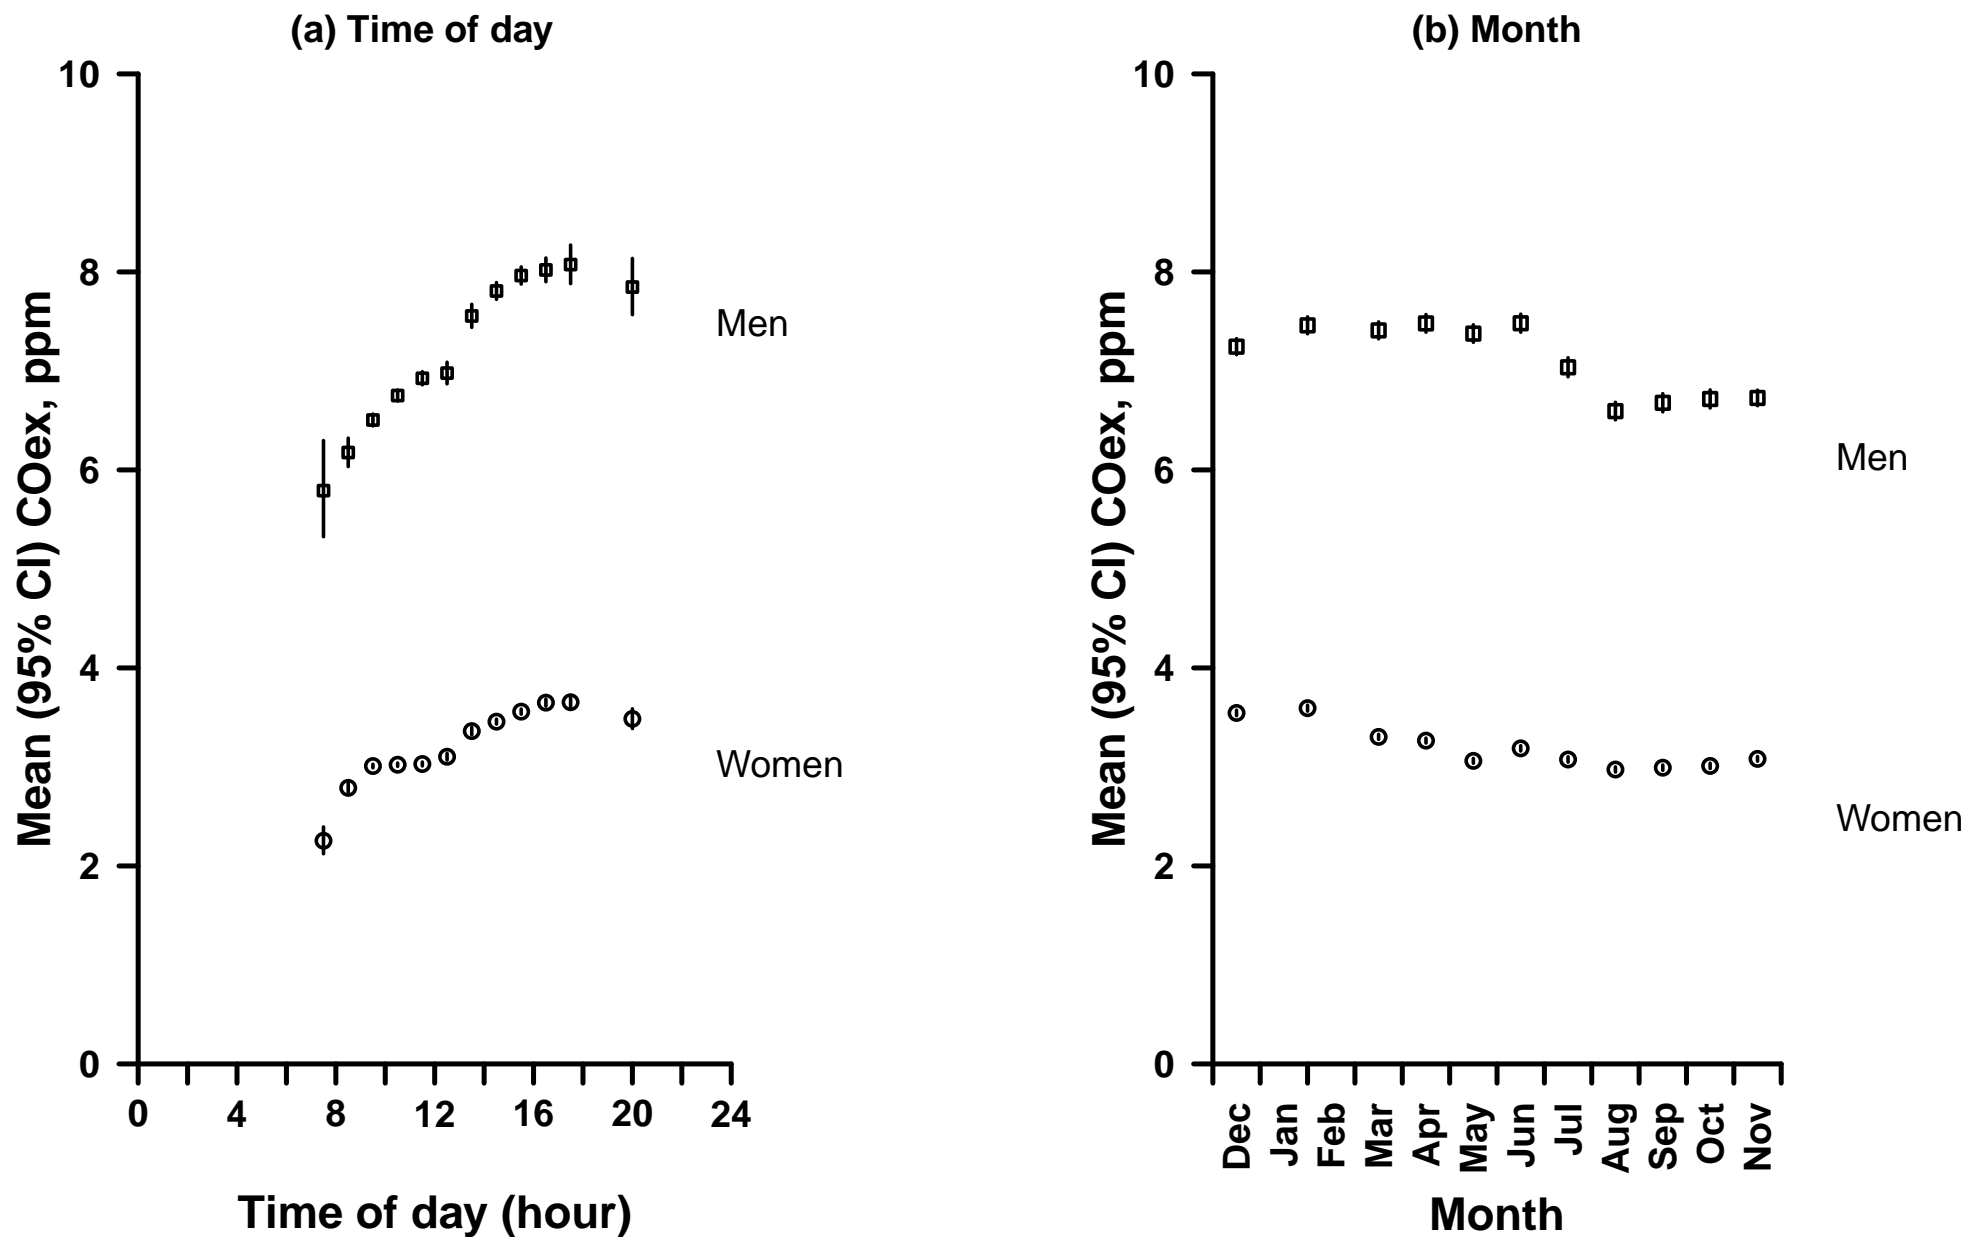

Estimates adjusted for age at survey and area

**Figure S2. Regional variations of geometric mean COex level by season among male and female never smokers**

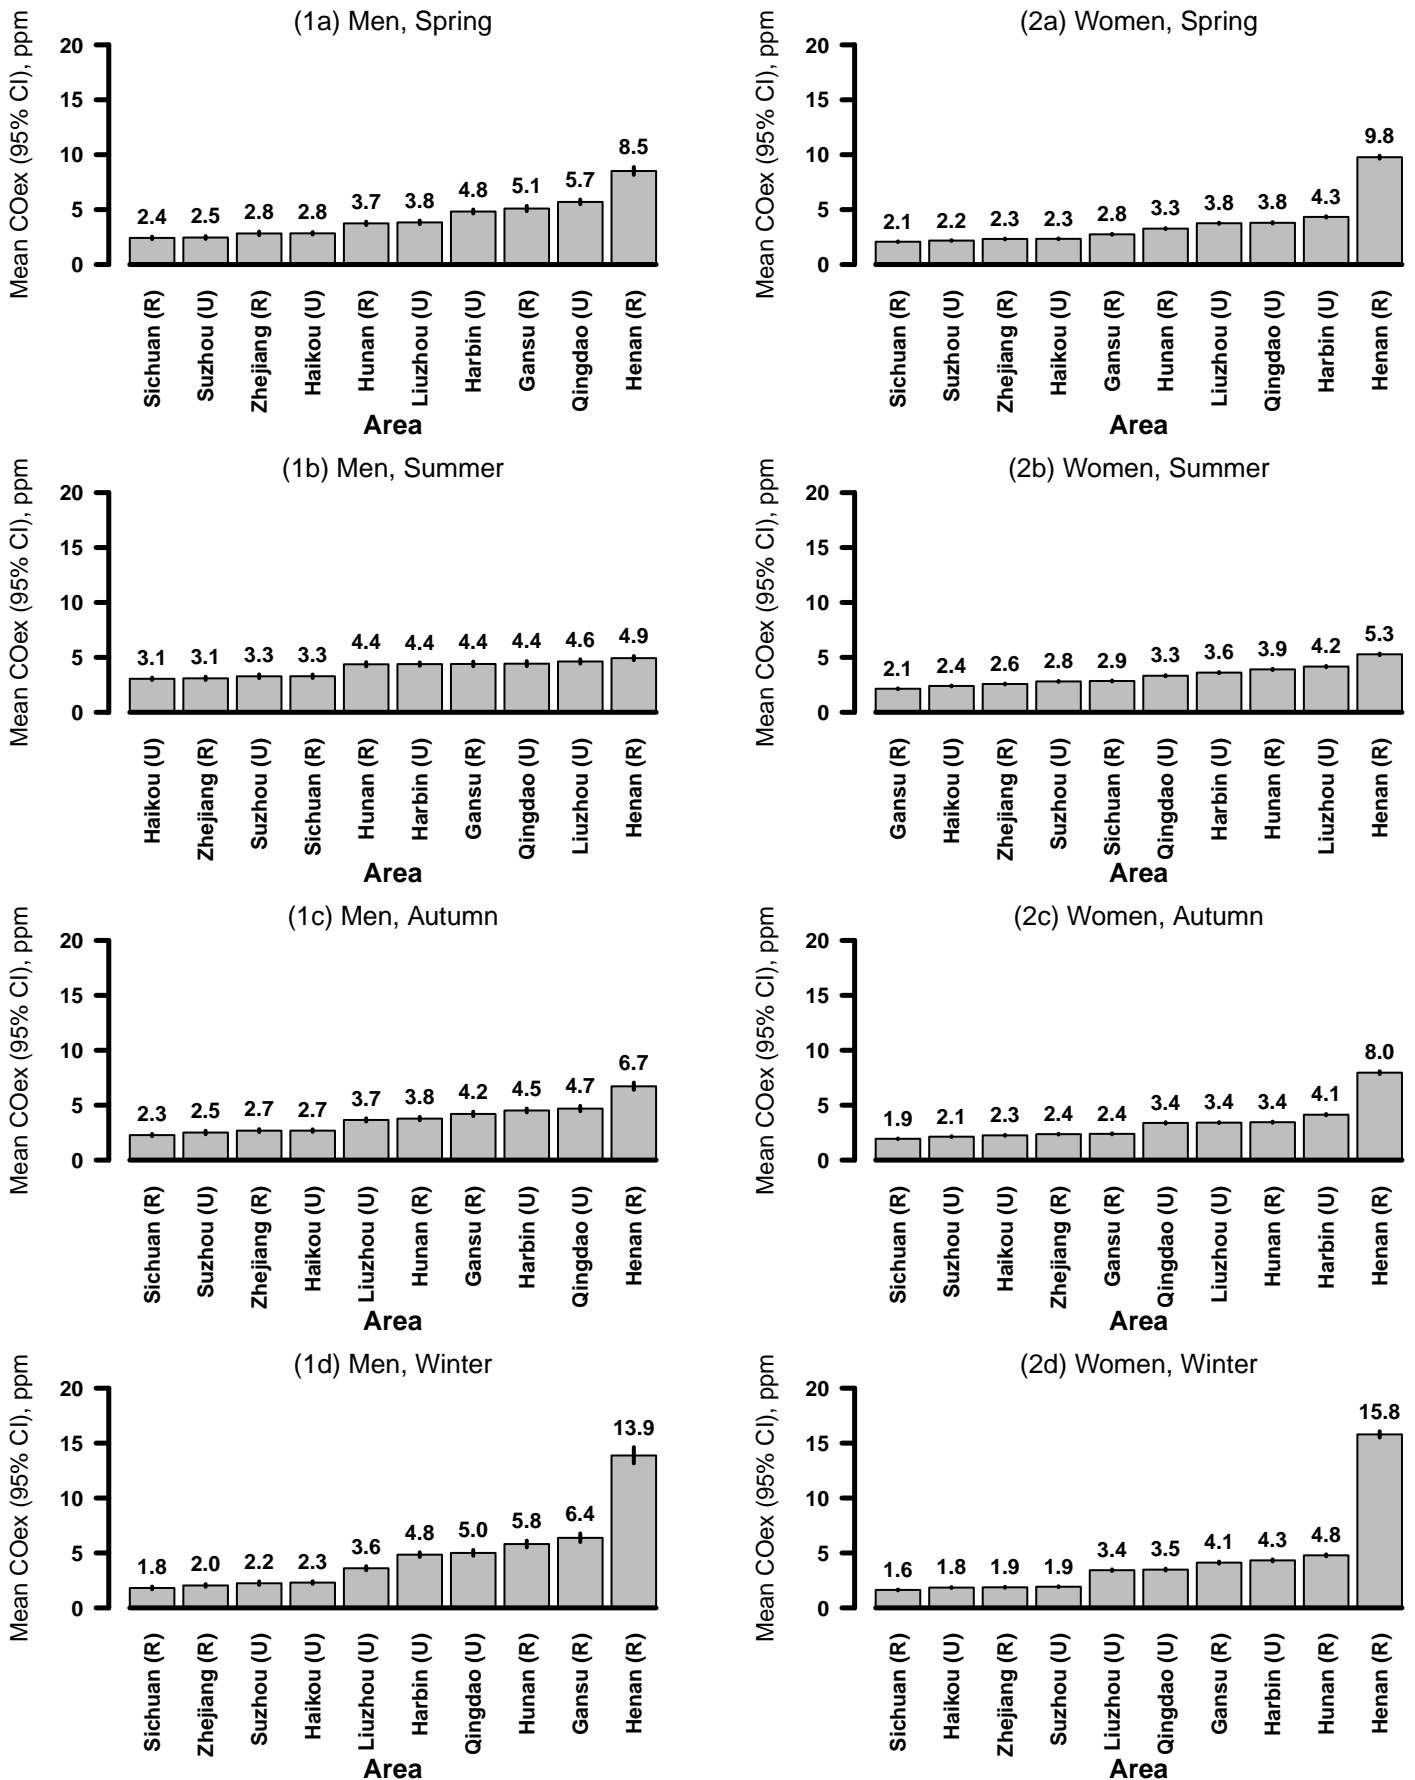

Estimates adjusted for age at survey, time of day and educational level  
 Abbreviation: U, urban area; R, rural area
